# Supplementary material
Source: PubMed Central journal article supplement (PMC4679705)

Proportion with at least one exacerbation (%) associated with rhinovirus

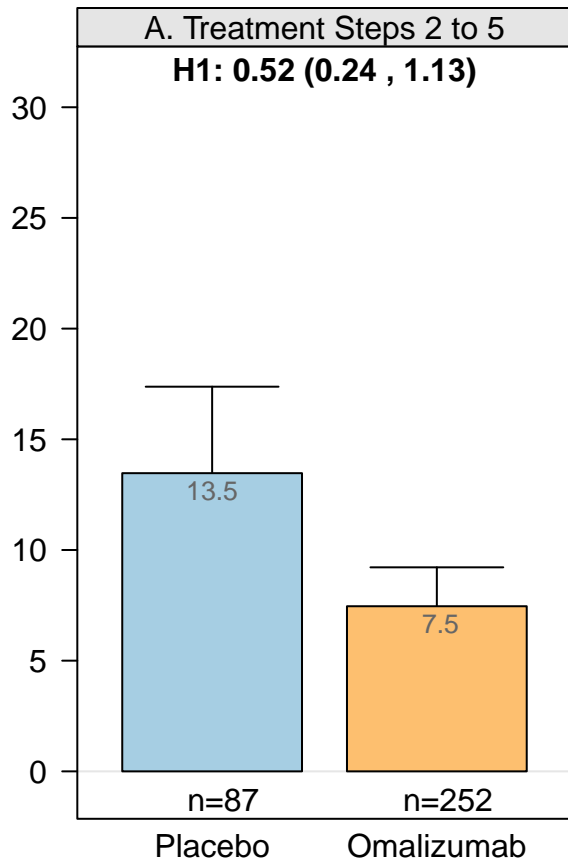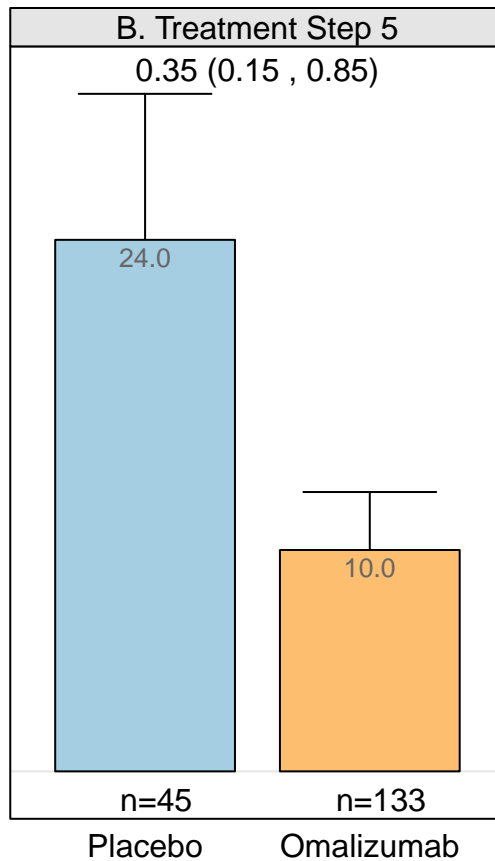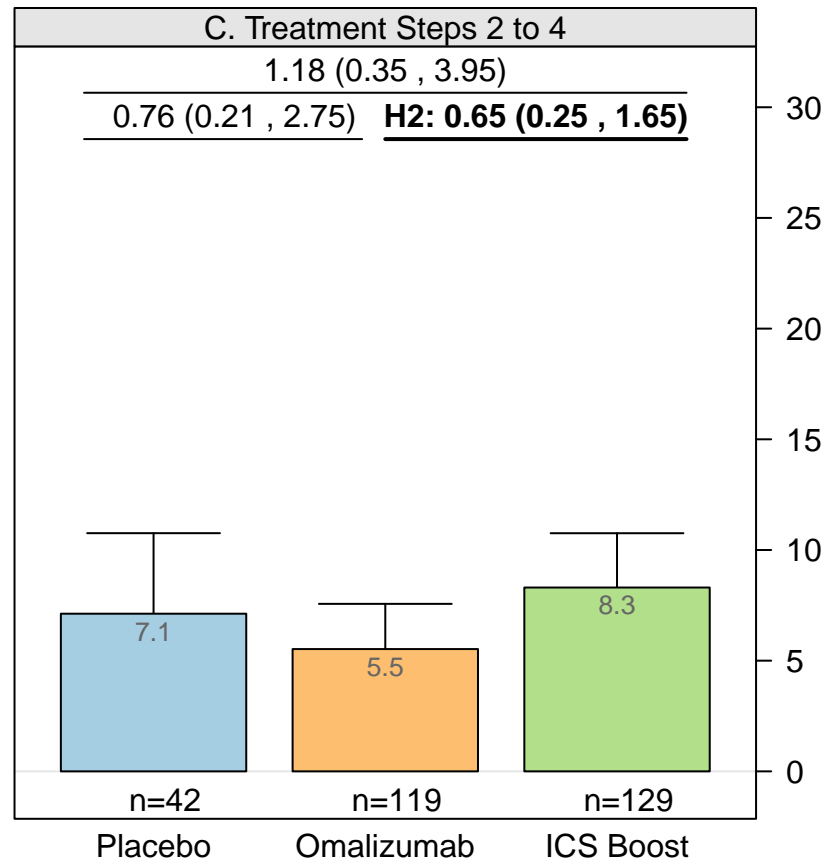

Supplement: NIHMS727270-supplement-2.pdf [file NIHMS727270-supplement-2.pdf]
